# Supplementary material for: The C 32 alkane-1,15-diol as a proxy of late Quaternary riverine input in coastal margins
Source: Copernicus journal article supplement (doi:10.5194/cp-13-1049-2017), 2017-08-22
Supplement: Supplementary file 1 [file cp-13-1049-2017-supplement.pdf]

Supplement of *Clim. Past*, 13, 1049–1061, 2017  
<https://doi.org/10.5194/cp-13-1049-2017-supplement>  
© Author(s) 2017. This work is distributed under  
the Creative Commons Attribution 3.0 License.

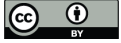

*Supplement of*

## **The C<sub>32</sub> alkane-1,15-diol as a proxy of late Quaternary riverine input in coastal margins**

**Julie Lattaud et al.**

*Correspondence to:* Julie Lattaud ([julie.lattaud@nioz.nl](mailto:julie.lattaud@nioz.nl))

The copyright of individual parts of the supplement might differ from the CC BY 3.0 License.

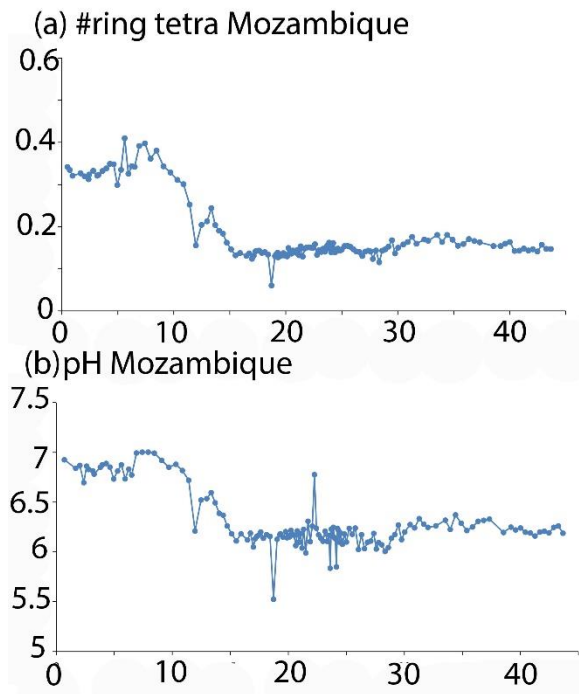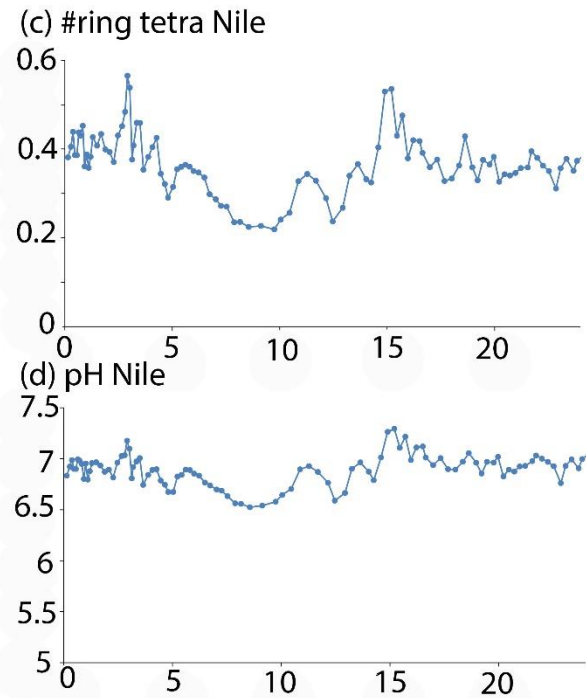

S1: (a) #ring tetra of core 64PE304-80, (b) reconstructed pH of core 64PE304-80, (c) #ring tetra of core Geob7702-3 and (d) reconstructed pH of core Geob7702-3.

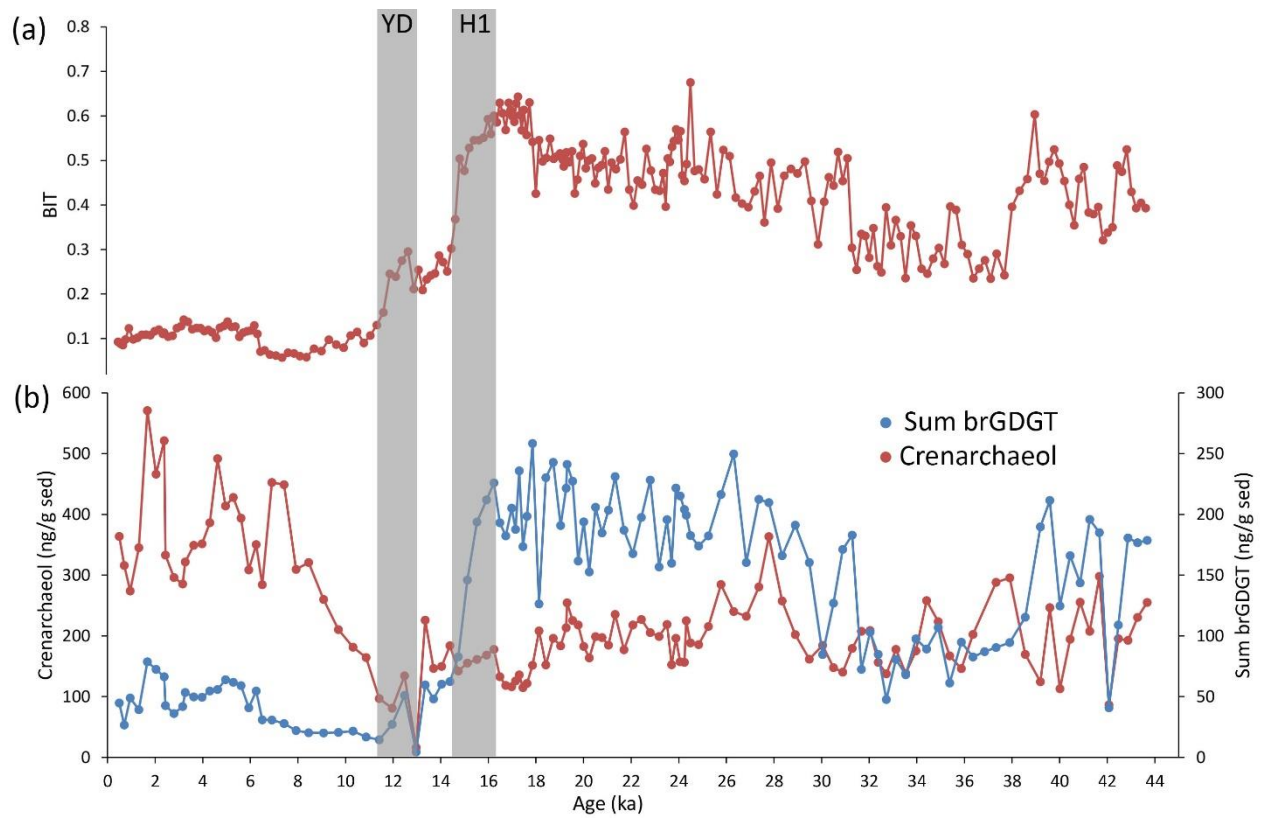

S2: (a) BIT index of core 64PE304-60 (from Kasper et al., 2015) and (b) Crenarchaeol and brGDGT concentration in core 64PE304-60.

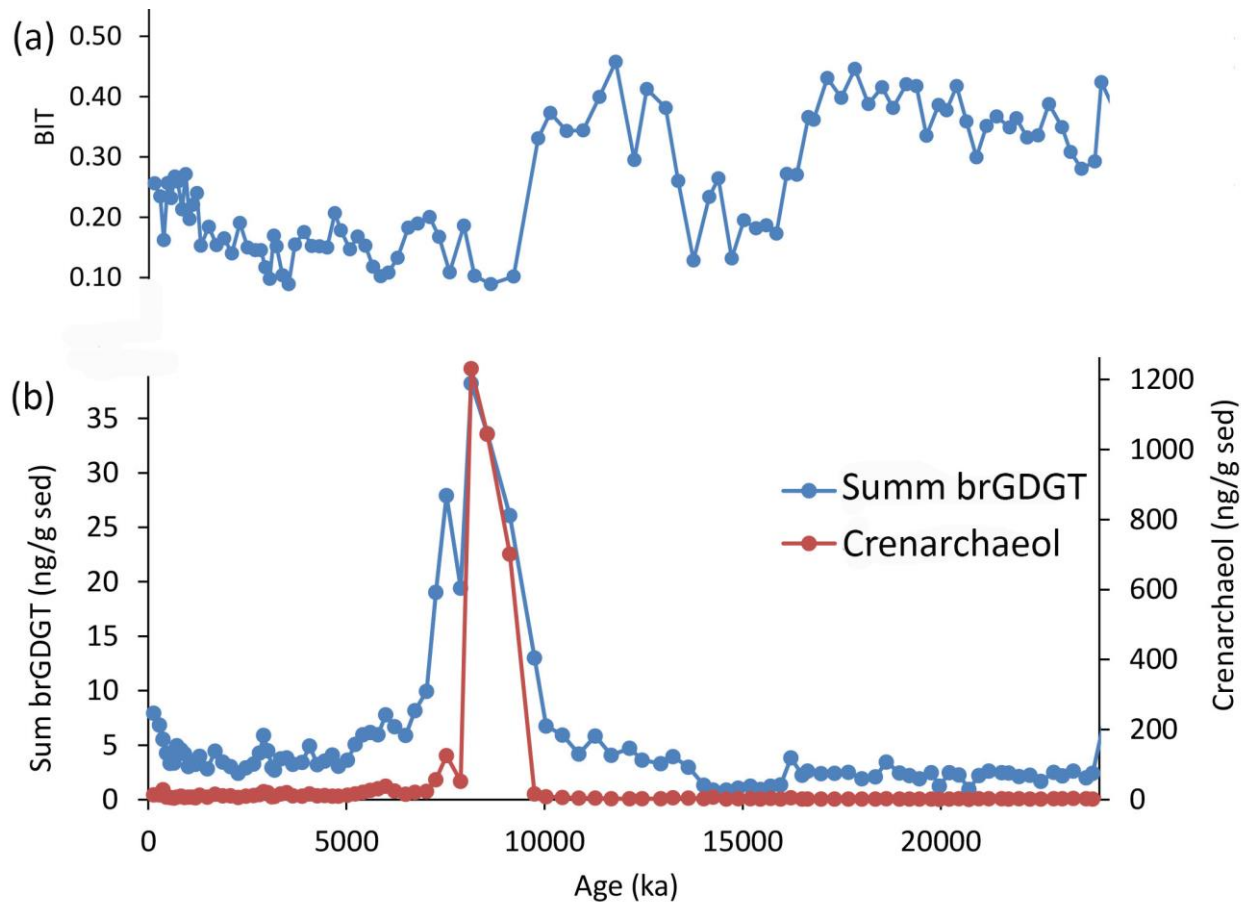

S3: (a) BIT index of core GeoB7702-3 (from Castañeda et al., 2010) and (b) Crenarchaeol and brGDGT concentration in core GeoB7702-3.

## **Supplementary information:**

### **Age-model of the core 64PE464-3**

The chronology was established as described by Kasper et al. (2015) by <sup>14</sup>C dating of mixed surface dwelling planktonic foraminifera (*Globigerinoides acculifer*, *G. trilobus* and *G. ruber*) for 20 sediment intervals. These samples were collected from the washed and sieved > 250 μm sediment fraction by selecting individual foraminifera specimens under a microscope. The age model for the upper 6 m, spanning the last 20 ka, was constrained by 11 <sup>14</sup>C dates and by stratigraphic correlation with a parallel core (GIK16160-3; Wang et al., 2013b; van der Lubbe et al., 2014). The age model between 20 and 39.5 ka BP was constrained by 9 additional <sup>14</sup>C dating points. The <sup>14</sup>C age values were converted to calendar age using the MARINE09 calibration curve that applies a standard reservoir correction of ~400 yr (Reimer et al., 2011).

### **Age-model of the core GeoB7702-3**

The chronology of GeoB 7702-3 was made as described by Castaneda et al. (2010), by <sup>14</sup>C dating of monospecific (*Globigerinoides ruber*) and mixed planktonic foraminifers in 15 sediment intervals. For conversion of the <sup>14</sup>C dates to calendar ages, the CALIB 5.01 program (Stuiver and Reimer, 1993) and the Marine04 Data Set (Hughen et al., 2004) were used with an average Atlantic reservoir age of ~400 years (Reimer et al., 2011). For <sup>14</sup>C ages older than 21,000 years the calibration curve and data set of Fairbanks et al. (2005) were used.
